# Supplementary material for: Crystal structure, bandgap, photoluminescence and resistivity properties of double perovskite Cs2AgBiCl6 single crystal and its thin film
Source: Royal Society of Chemistry journal article supplement (doi:10.1039/d4ra06936f), 2024-01-01
Supplement: d4ra06936f1.pdf [file d4ra06936f1.pdf]

## Electronic Supplementary

### Information (ESI)

#### Title: Crystal Structure, Bandgap, Photoluminescence and Resistivity Properties of Double Perovskite $\text{Cs}_2\text{AgBiCl}_6$ Single Crystal and its Thin Film

Huidan Gao,<sup>a</sup> Chen Wang,<sup>a</sup> Huimeng Shen,<sup>a</sup> Huawei Zhou,<sup>a,\*</sup> Xianxi Zhang,<sup>a,\*</sup>

<sup>a</sup> School of Chemistry and Chemical Engineering, College of Materials Science and Engineering, Shandong Provincial Key Laboratory/Collaborative Innovation Center of Chemical Energy Storage, Liaocheng University.

\*E-mail: zhouhuaweiopv@163.com, xxzhang3@126.com.

#### Supplementary Figures

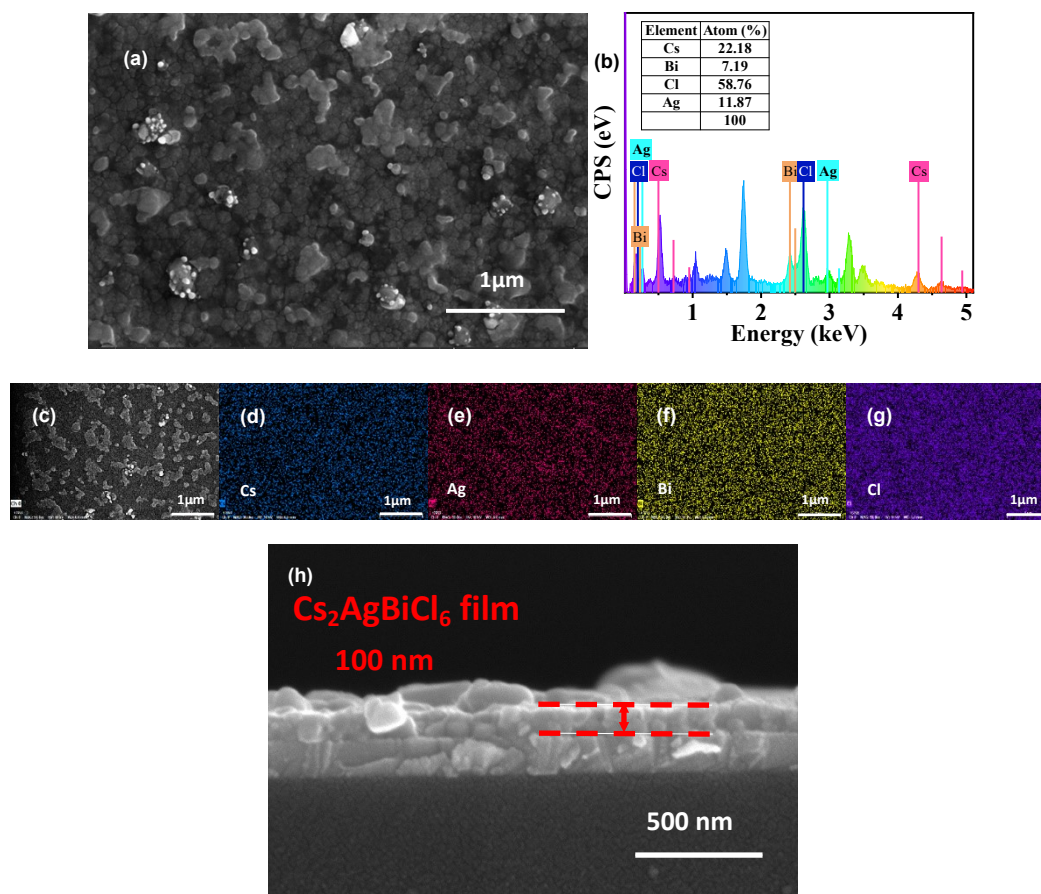

Figure S1 Vapor deposited Cs<sub>2</sub>AgBiCl<sub>6</sub>-DP thin film for studying resistance characteristics. (a) SEM image of Cs<sub>2</sub>AgBiCl<sub>6</sub>-DP thin film; (b) EDS spectrum and element content of Cs<sub>2</sub>AgBiCl<sub>6</sub>-DP thin film; the region (c) Corresponding to element mapping of Cs (d), Ag (e), Bi (f) and Cl (g) in Cs<sub>2</sub>AgBiCl<sub>6</sub>-DP thin film; (h) The SEM image of the cross-sectional morphology of the Cs<sub>2</sub>AgBiCl<sub>6</sub>-DP thin film.

## Supplementary Tables

**Table S1** Atomic coordinates ( $\times 10^4$ ) and equivalent isotropic displacement parameters ( $\text{\AA}^2 \times 10^3$ ) for Cs<sub>2</sub>AgBiCl<sub>6</sub>. U(eq) is defined as one third of the trace of the orthogonalized U<sub>ij</sub> tensor.

| Atom  | x    | y     | z        | U(eq) |
|-------|------|-------|----------|-------|
| Bi(1) | 5000 | 10000 | 5000     | 20(3) |
| Ag(1) | 5000 | 10000 | 0        | 37(5) |
| Cs(1) | 2500 | 7500  | 2500     | 49(4) |
| Cl(1) | 5000 | 10000 | 2522(13) | 29(5) |

**Table S2** Bond lengths [ $\text{\AA}$ ] and angles [deg] for Cs<sub>2</sub>AgBiCl<sub>6</sub>.

| Bond           | Bond lengths [ $\text{\AA}$ ] and angles [deg] |
|----------------|------------------------------------------------|
| Bi(1)-Cl(1)#1  | 2.675(14)                                      |
| Bi(1)-Cl(1)#2  | 2.675(14)                                      |
| Bi(1)-Cl(1)#3  | 2.675(14)                                      |
| Bi(1)-Cl(1)#4  | 2.675(14)                                      |
| Bi(1)-Cl(1)#5  | 2.675(14)                                      |
| Bi(1)-Cl(1)    | 2.675(14)                                      |
| Bi(1)-Cs(1)#5  | 4.6735(3)                                      |
| Bi(1)-Cs(1)#6  | 4.6735(3)                                      |
| Bi(1)-Cs(1)#7  | 4.6735(3)                                      |
| Bi(1)-Cs(1)#8  | 4.6735(3)                                      |
| Bi(1)-Cs(1)#9  | 4.6735(3)                                      |
| Bi(1)-Cs(1)#10 | 4.6735(3)                                      |
| Ag(1)-Cl(1)#11 | 2.722(14)                                      |
| Ag(1)-Cl(1)    | 2.722(14)                                      |
| Ag(1)-Cl(1)#12 | 2.722(14)                                      |
| Ag(1)-Cl(1)#13 | 2.722(14)                                      |
| Ag(1)-Cl(1)#14 | 2.722(14)                                      |
| Ag(1)-Cl(1)#15 | 2.722(14)                                      |
| Cs(1)-Cl(1)#1  | 3.8160(3)                                      |
| Cs(1)-Cl(1)#4  | 3.8160(3)                                      |
| Cs(1)-Cl(1)    | 3.8160(3)                                      |
| Cs(1)-Cl(1)#16 | 3.8160(3)                                      |
| Cs(1)-Cl(1)#17 | 3.8160(3)                                      |
| Cs(1)-Cl(1)#18 | 3.8160(3)                                      |
| Cs(1)-Cl(1)#13 | 3.8160(3)                                      |
| Cs(1)-Cl(1)#19 | 3.8160(3)                                      |

|                       |            |
|-----------------------|------------|
| Cs(1)-Cl(1)#14        | 3.8160(3)  |
| Cs(1)-Cl(1)#20        | 3.8160(3)  |
| Cs(1)-Cl(1)#7         | 3.8160(3)  |
| Cs(1)-Cl(1)#6         | 3.8160(3)  |
| Cl(1)-Cs(1)#9         | 3.8160(3)  |
| Cl(1)-Cs(1)#7         | 3.8160(3)  |
| Cl(1)-Cs(1)#6         | 3.8160(3)  |
| Cl(1)#1-Bi(1)-Cl(1)#2 | 180.000(2) |
| Cl(1)#1-Bi(1)-Cl(1)#3 | 90.000(1)  |
| Cl(1)#2-Bi(1)-Cl(1)#3 | 90.000(4)  |
| Cl(1)#1-Bi(1)-Cl(1)#4 | 90.000(4)  |
| Cl(1)#2-Bi(1)-Cl(1)#4 | 90.000(3)  |
| Cl(1)#3-Bi(1)-Cl(1)#4 | 180        |
| Cl(1)#1-Bi(1)-Cl(1)#5 | 90.000(1)  |
| Cl(1)#2-Bi(1)-Cl(1)#5 | 90         |
| Cl(1)#3-Bi(1)-Cl(1)#5 | 90.000(1)  |
| Cl(1)#4-Bi(1)-Cl(1)#5 | 90.000(1)  |
| Cl(1)#1-Bi(1)-Cl(1)   | 90.000(1)  |
| Cl(1)#2-Bi(1)-Cl(1)   | 90         |
| Cl(1)#3-Bi(1)-Cl(1)   | 90.000(1)  |
| Cl(1)#4-Bi(1)-Cl(1)   | 90.000(2)  |
| Cl(1)#5-Bi(1)-Cl(1)   | 180.000(1) |
| Cl(1)#1-Bi(1)-Cs(1)#5 | 125.264(1) |
| Cl(1)#2-Bi(1)-Cs(1)#5 | 54.736(1)  |
| Cl(1)#3-Bi(1)-Cs(1)#5 | 54.7       |
| Cl(1)#4-Bi(1)-Cs(1)#5 | 125.264(1) |
| Cl(1)#5-Bi(1)-Cs(1)#5 | 54.736(2)  |
| Cl(1)-Bi(1)-Cs(1)#5   | 125.264(1) |
| Cl(1)#1-Bi(1)-Cs(1)#6 | 54.736(1)  |
| Cl(1)#2-Bi(1)-Cs(1)#6 | 125.264(1) |
| Cl(1)#3-Bi(1)-Cs(1)#6 | 54.7       |
| Cl(1)#4-Bi(1)-Cs(1)#6 | 125.264(1) |
| Cl(1)#5-Bi(1)-Cs(1)#6 | 125.264(1) |
| Cl(1)-Bi(1)-Cs(1)#6   | 54.736(1)  |
| Cs(1)#5-Bi(1)-Cs(1)#6 | 109.5      |
| Cl(1)#1-Bi(1)-Cs(1)#7 | 125.264(1) |
| Cl(1)#2-Bi(1)-Cs(1)#7 | 54.736(1)  |
| Cl(1)#3-Bi(1)-Cs(1)#7 | 125.3      |
| Cl(1)#4-Bi(1)-Cs(1)#7 | 54.7       |
| Cl(1)#5-Bi(1)-Cs(1)#7 | 125.264(1) |
| Cl(1)-Bi(1)-Cs(1)#7   | 54.736(1)  |
| Cs(1)#5-Bi(1)-Cs(1)#7 | 109.5      |
| Cs(1)#6-Bi(1)-Cs(1)#7 | 109.5      |

|                         |            |
|-------------------------|------------|
| Cl(1)#1-Bi(1)-Cs(1)#8   | 54.736(1)  |
| Cl(1)#2-Bi(1)-Cs(1)#8   | 125.264(1) |
| Cl(1)#3-Bi(1)-Cs(1)#8   | 125.3      |
| Cl(1)#4-Bi(1)-Cs(1)#8   | 54.7       |
| Cl(1)#5-Bi(1)-Cs(1)#8   | 54.736(2)  |
| Cl(1)-Bi(1)-Cs(1)#8     | 125.264(1) |
| Cs(1)#5-Bi(1)-Cs(1)#8   | 109.5      |
| Cs(1)#6-Bi(1)-Cs(1)#8   | 109.5      |
| Cs(1)#7-Bi(1)-Cs(1)#8   | 109.5      |
| Cl(1)#1-Bi(1)-Cs(1)#9   | 125.264(1) |
| Cl(1)#2-Bi(1)-Cs(1)#9   | 54.736(1)  |
| Cl(1)#3-Bi(1)-Cs(1)#9   | 54.7       |
| Cl(1)#4-Bi(1)-Cs(1)#9   | 125.3      |
| Cl(1)#5-Bi(1)-Cs(1)#9   | 125.264(2) |
| Cl(1)-Bi(1)-Cs(1)#9     | 54.736(1)  |
| Cs(1)#5-Bi(1)-Cs(1)#9   | 70.5       |
| Cs(1)#6-Bi(1)-Cs(1)#9   | 70.5       |
| Cs(1)#7-Bi(1)-Cs(1)#9   | 70.5       |
| Cs(1)#8-Bi(1)-Cs(1)#9   | 180        |
| Cl(1)#1-Bi(1)-Cs(1)#10  | 54.736(1)  |
| Cl(1)#2-Bi(1)-Cs(1)#10  | 125.264(1) |
| Cl(1)#3-Bi(1)-Cs(1)#10  | 54.7       |
| Cl(1)#4-Bi(1)-Cs(1)#10  | 125.3      |
| Cl(1)#5-Bi(1)-Cs(1)#10  | 54.736(1)  |
| Cl(1)-Bi(1)-Cs(1)#10    | 125.264(1) |
| Cs(1)#5-Bi(1)-Cs(1)#10  | 70.5       |
| Cs(1)#6-Bi(1)-Cs(1)#10  | 70.5       |
| Cs(1)#7-Bi(1)-Cs(1)#10  | 180        |
| Cs(1)#8-Bi(1)-Cs(1)#10  | 70.5       |
| Cs(1)#9-Bi(1)-Cs(1)#10  | 109.5      |
| Cl(1)#11-Ag(1)-Cl(1)    | 90.000(1)  |
| Cl(1)#11-Ag(1)-Cl(1)#12 | 90.000(1)  |
| Cl(1)-Ag(1)-Cl(1)#12    | 180.000(1) |
| Cl(1)#11-Ag(1)-Cl(1)#13 | 90.000(1)  |
| Cl(1)-Ag(1)-Cl(1)#13    | 90         |
| Cl(1)#12-Ag(1)-Cl(1)#13 | 90         |
| Cl(1)#11-Ag(1)-Cl(1)#14 | 180        |
| Cl(1)-Ag(1)-Cl(1)#14    | 90         |
| Cl(1)#12-Ag(1)-Cl(1)#14 | 90.000(2)  |
| Cl(1)#13-Ag(1)-Cl(1)#14 | 90.000(2)  |
| Cl(1)#11-Ag(1)-Cl(1)#15 | 90.000(1)  |
| Cl(1)-Ag(1)-Cl(1)#15    | 90         |
| Cl(1)#12-Ag(1)-Cl(1)#15 | 90         |
| Cl(1)#13-Ag(1)-Cl(1)#15 | 180.000(1) |

|                         |            |
|-------------------------|------------|
| Cl(1)#14-Ag(1)-Cl(1)#15 | 90.000(1)  |
| Cl(1)#1-Cs(1)-Cl(1)#4   | 59.4(3)    |
| Cl(1)#1-Cs(1)-Cl(1)     | 59.4(3)    |
| Cl(1)#4-Cs(1)-Cl(1)     | 59.4(3)    |
| Cl(1)#1-Cs(1)-Cl(1)#16  | 179.3(4)   |
| Cl(1)#4-Cs(1)-Cl(1)#16  | 119.999(2) |
| Cl(1)-Cs(1)-Cl(1)#16    | 119.999(2) |
| Cl(1)#1-Cs(1)-Cl(1)#17  | 119.999(2) |
| Cl(1)#4-Cs(1)-Cl(1)#17  | 179.3(4)   |
| Cl(1)-Cs(1)-Cl(1)#17    | 119.999(2) |
| Cl(1)#16-Cs(1)-Cl(1)#17 | 60.6(3)    |
| Cl(1)#1-Cs(1)-Cl(1)#18  | 119.999(1) |
| Cl(1)#4-Cs(1)-Cl(1)#18  | 119.999(2) |
| Cl(1)-Cs(1)-Cl(1)#18    | 179.3(4)   |
| Cl(1)#16-Cs(1)-Cl(1)#18 | 60.6(3)    |
| Cl(1)#17-Cs(1)-Cl(1)#18 | 60.6(3)    |
| Cl(1)#1-Cs(1)-Cl(1)#13  | 90.002(4)  |
| Cl(1)#4-Cs(1)-Cl(1)#13  | 119.999(1) |
| Cl(1)-Cs(1)-Cl(1)#13    | 60.6(3)    |
| Cl(1)#16-Cs(1)-Cl(1)#13 | 90.002(3)  |
| Cl(1)#17-Cs(1)-Cl(1)#13 | 59.4(3)    |
| Cl(1)#18-Cs(1)-Cl(1)#13 | 119.999(2) |
| Cl(1)#1-Cs(1)-Cl(1)#19  | 90.002(3)  |
| Cl(1)#4-Cs(1)-Cl(1)#19  | 60.6(3)    |
| Cl(1)-Cs(1)-Cl(1)#19    | 119.999(2) |
| Cl(1)#16-Cs(1)-Cl(1)#19 | 90.002(4)  |
| Cl(1)#17-Cs(1)-Cl(1)#19 | 119.999(2) |
| Cl(1)#18-Cs(1)-Cl(1)#19 | 59.4(3)    |
| Cl(1)#13-Cs(1)-Cl(1)#19 | 179.3(4)   |
| Cl(1)#1-Cs(1)-Cl(1)#14  | 119.999(1) |
| Cl(1)#4-Cs(1)-Cl(1)#14  | 90.002(3)  |
| Cl(1)-Cs(1)-Cl(1)#14    | 60.6(3)    |
| Cl(1)#16-Cs(1)-Cl(1)#14 | 59.4(3)    |
| Cl(1)#17-Cs(1)-Cl(1)#14 | 90.002(3)  |
| Cl(1)#18-Cs(1)-Cl(1)#14 | 119.999(2) |
| Cl(1)#13-Cs(1)-Cl(1)#14 | 60.6(3)    |
| Cl(1)#19-Cs(1)-Cl(1)#14 | 119.999(2) |
| Cl(1)#1-Cs(1)-Cl(1)#20  | 60.6(3)    |
| Cl(1)#4-Cs(1)-Cl(1)#20  | 90.002(3)  |
| Cl(1)-Cs(1)-Cl(1)#20    | 119.999(1) |
| Cl(1)#16-Cs(1)-Cl(1)#20 | 119.999(2) |
| Cl(1)#17-Cs(1)-Cl(1)#20 | 90.002(3)  |
| Cl(1)#18-Cs(1)-Cl(1)#20 | 59.4(3)    |
| Cl(1)#13-Cs(1)-Cl(1)#20 | 119.999(1) |

|                         |            |
|-------------------------|------------|
| Cl(1)#19-Cs(1)-Cl(1)#20 | 59.4(3)    |
| Cl(1)#14-Cs(1)-Cl(1)#20 | 179.3(4)   |
| Cl(1)#1-Cs(1)-Cl(1)#7   | 119.999(2) |
| Cl(1)#4-Cs(1)-Cl(1)#7   | 60.6(3)    |
| Cl(1)-Cs(1)-Cl(1)#7     | 90.002(3)  |
| Cl(1)#16-Cs(1)-Cl(1)#7  | 59.4(3)    |
| Cl(1)#17-Cs(1)-Cl(1)#7  | 119.999(2) |
| Cl(1)#18-Cs(1)-Cl(1)#7  | 90.002(4)  |
| Cl(1)#13-Cs(1)-Cl(1)#7  | 119.999(1) |
| Cl(1)#19-Cs(1)-Cl(1)#7  | 60.6(3)    |
| Cl(1)#14-Cs(1)-Cl(1)#7  | 59.4(3)    |
| Cl(1)#20-Cs(1)-Cl(1)#7  | 119.999(1) |
| Cl(1)#1-Cs(1)-Cl(1)#6   | 60.6(3)    |
| Cl(1)#4-Cs(1)-Cl(1)#6   | 119.999(1) |
| Cl(1)-Cs(1)-Cl(1)#6     | 90.002(4)  |
| Cl(1)#16-Cs(1)-Cl(1)#6  | 119.999(2) |
| Cl(1)#17-Cs(1)-Cl(1)#6  | 59.4(3)    |
| Cl(1)#18-Cs(1)-Cl(1)#6  | 90.002(3)  |
| Cl(1)#13-Cs(1)-Cl(1)#6  | 59.4(3)    |
| Cl(1)#19-Cs(1)-Cl(1)#6  | 119.999(1) |
| Cl(1)#14-Cs(1)-Cl(1)#6  | 119.999(2) |
| Cl(1)#20-Cs(1)-Cl(1)#6  | 60.6(3)    |
| Cl(1)#7-Cs(1)-Cl(1)#6   | 179.3(4)   |
| Bi(1)-Cl(1)-Ag(1)       | 180        |
| Bi(1)-Cl(1)-Cs(1)       | 90.3(2)    |
| Ag(1)-Cl(1)-Cs(1)       | 89.7(2)    |
| Bi(1)-Cl(1)-Cs(1)#9     | 90.3(2)    |
| Ag(1)-Cl(1)-Cs(1)#9     | 89.7(2)    |
| Cs(1)-Cl(1)-Cs(1)#9     | 179.3(4)   |
| Bi(1)-Cl(1)-Cs(1)#7     | 90.3(2)    |
| Ag(1)-Cl(1)-Cs(1)#7     | 89.7(2)    |
| Cs(1)-Cl(1)-Cs(1)#7     | 89.998(3)  |
| Cs(1)#9-Cl(1)-Cs(1)#7   | 89.998(3)  |
| Bi(1)-Cl(1)-Cs(1)#6     | 90.3(2)    |
| Ag(1)-Cl(1)-Cs(1)#6     | 89.7(2)    |
| Cs(1)-Cl(1)-Cs(1)#6     | 89.998(3)  |
| Cs(1)#9-Cl(1)-Cs(1)#6   | 89.998(3)  |
| Cs(1)#7-Cl(1)-Cs(1)#6   | 179.3(4)   |

---

Symmetry transformations used to generate equivalent atoms:

- #1  $-x+1, z+1/2, y-1/2$     #2  $x, -z+3/2, -y+3/2$   
#3  $-z+1, -x+3/2, -y+3/2$     #4  $z, x+1/2, y-1/2$   
#5  $-x+1, -y+2, -z+1$     #6  $-x+1, -y+3/2, -z+1/2$   
#7  $-x+1/2, -y+2, -z+1/2$     #8  $-x+1/2, -y+3/2, -z+1$   
#9  $x+1/2, y+1/2, z$     #10  $x+1/2, y, z+1/2$

#11  $z+1/2, x+1/2, y-1$       #12  $-x+1, -y+2, -z$   
#13  $x, -z+1, -y+1$       #14  $-z+1/2, -x+3/2, -y+1$   
#15  $-x+1, z+1, y-1$       #16  $-x+1/2, z+1/2, y-1$   
#17  $z, x, y-1$       #18  $x-1/2, y-1/2, z$       #19  $x-1/2, -z+1, -y+3/2$   
#20  $-z+1/2, -x+1, -y+3/2$

**Table S3** Anisotropic displacement parameters ( $\text{Å}^2 \times 10^3$ ) for  $\text{Cs}_2\text{AgBiCl}_6$ . The anisotropic displacement factor exponent takes the form:  $-2 \pi^2 [h^2 a^{*2} U_{11} + \dots + 2 h k a^* b^* U_{12}]$ .

|       | <b>U11</b> | <b>U22</b> | <b>U33</b> | <b>U23</b> | <b>U13</b> | <b>U12</b> |
|-------|------------|------------|------------|------------|------------|------------|
| Bi(1) | 20(3)      | 20(3)      | 20(3)      | 0          | 0          | 0          |
| Ag(1) | 37(5)      | 37(5)      | 37(5)      | 0          | 0          | 0          |
| Cs(1) | 49(4)      | 49(4)      | 49(4)      | 0          | 0          | 0          |
| Cl(1) | 37(7)      | 37(7)      | 11(7)      | 0          | 0          | 0          |
